# Supplementary material
Source: publisher figshare collection journal article supplement (https://gsajournals.figshare.com/articles/dataset/_/12445469)
Supplement: Supplementary file 1 [file 1]

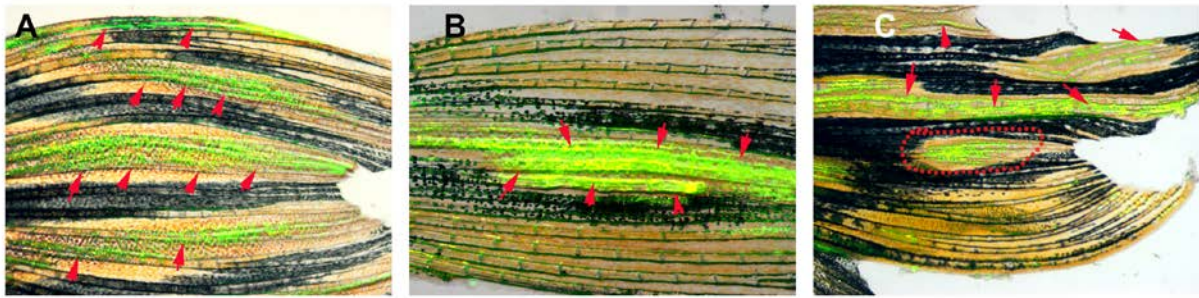

**Figure S8. EGFP is not consistently correlated with elongated fins in  $F_0$  adult *actinb:kcni13*-EGFP transgenic fish.** Both normal-sized and elongated fin rays are labeled with EGFP. **(A)** A normal-sized fish. GFP is found in multiple fin rays. **(B)** A relatively uniform elongated fin. Only the middle part of the fin rays are labeled with GFP. **(C)** A partially elongated fin. GFP is found in most of the elongated fin rays, but normal-sized fin region is also labeled with GFP (the region of the dashed red line). Arrows indicated positions of GFP.
