# Supplementary material
Source: publisher figshare collection journal article supplement (https://gsajournals.figshare.com/articles/dataset/_/12445469)
Supplement: Supplementary file 1 [file 2]

## Sheet: Table S1
Table S1. PCR primers used in this study.
Primer Names	Sequences (5’-> 3’)
Dr.kcna1a-1F	CACCATGACAGTTGTGGCTGGGGACA
Dr.kcna1a-1476R	GACATCGGTTAGCAGCTTACTTTTGT
Dr.kcna1a-1479R	CTAGACATCGGTTAGCAGCTTACTTTT
Dr.kcnk9-1F	CACCATGGCACTGCGCGCCGGGAGGA
Dr.kcnk9-1470R	GATGGACTTGCGTCGTCTCATAAGCC
Dr.kcnk9-1473R	TCAGATGGACTTGCGTCGTCTCA
Dr.kcnj10b-1F	CACCATGACCTCGGCCACACCCCCCCCTCAT
Dr.kcnj10b-1243R	GACGTTACTGATACGCACGGTGA
Dr.kcnj10b-1246R	TCAGACGTTACTGATACGCACGGT
Dr.kcnj10a-ORF-1F	CACCATGACTTCAGCCACGCCCCCT
Dr.kcnj10a-ORF-1278R	ATACACGTTACTGATGCGTACGCTAAG
Dr.kcnj10a-ORF-1278R-WT	CTACACGTTACTGATGCGTACGCTAAG
Dr.kcnj1b-1F	CACCATGTTCCAGTTCATCCGGAAACAG
Dr.kcnj1b-1126R	ATCGCCCTTCTCAGTTACATCAGC
Dr.kcnj1b-1129R	TTAATCGCCCTTCTCAGTTACATCAG
Dr.kcnj16-1F	CACCATGAATTCAGGTAAGGTGCAGTACTCT
Dr.kcnj16-1029R	TAGGTCATACTCCTCTGCGCTTAAT
Dr.kcnj13-ORF-1090R-WT	CTACTCCACGCGGTCGCTGCCT
Dr.kcnj13-ORF-1F	CACCATGCCTACCACCATGACAAACAC
Dr.kcnj13-ORF-1090R	CTTCTCCACGCGGTCGCTGCCT
Dr.kcnj13-178F-afl2	CGACGGCCAGTCTTAAGTGTTCTCCTCCTCTCTCAAGCT
Dr.kcnj13-142R-ecor1	GATCTGTTAACGAATTACCGAATAATCTTGCTAACGGACC
Dr.And1-ORF-1F	CACCATGGCTCATTTGAGAGGATCTTCCA
Dr.And1-ORF-1711R	TTTCTTTCTGTAGTCTCCATTGTAGGCA
Dr.col2a1a-ORF-45F	CACCATGTTCAGATTGCTGGATTCACG
Dr.col2a1a-ORF-4602R	TGCATCCTCACAGTTATTGCTCG
Dr.fgf8a-F	AAAAACCTTGGACATTTCTTTCTGC
Dr.fgf8a-R	TGGGTATCTTATCGCTGGGTGGTC
Dr.Hoxd13a-F	ATGGACGGAGGAGGACTGGATGAA
Dr.Hoxd13a-R	TGTATGGGAAAGAGGAAATTGACG
Dr.sox9a-157F	CGGTGTTCGCATGAATCTCCTCG
Dr.sox9a-1798R	TTCGAGTCTTTCCCATCATGCAC
Dr.shha-orf-1F	CACCATGCGGCTTTTGACGAGAGTG
Dr.shha-orf-1253R	GCTTGAGTTTACTGACATCCCCAA
Dr.kcnj13-MutP1-F (T131A)	GACGCAACTCGCTATTCGGTATGGCACAATGTACCCAA
Dr.kcnj13-MutP1-R (T131A)	CATACCGAATAGCGAGTTGCGTCTCCAGGGCGAACGAGA
Dr.kcnj13-MutM2-F (Q153H)	CTTGCCCTGCAcATcCTTCTGGGACTCATGCTGGAGGCCT
Dr.kcnj13-MutM2-R (Q153H)	GTCCCAGAAGgATgTGCAGGGCAAGCAGCGCGATGGCAGT
Dr.kcnj13-MutM3-F (M135R)	GGGTATGGCACAcgGTACCCAAACGCAGACTGCCCCA
Dr.kcnj13-MutM3-R (M135R)	GTTTGGGTACcgTGTGCCATACCCAATAGTGAGTTGCGT
Dr.kcnj13-178F	GTGTTCTCCTCCTCTCTCAAGC
Dr.kcnj13-201R	TTAGTCATGCTCACCCAATGC
MSL4	GCTAGCTTGCCAAACCTACAGGT
Dr.kcnj13-74F	GGAGTTTCTTCAGTGCATCTGACTC
Dr.kcnj13-462R	TGGCTGGAGGTTACACACTCG
LacZ-129F	GCGCAGCCTGAATGGCGAATG
LacZ-2486R	GTAATCAGCACCGCATCAGCAAG
Dr.kcnj13-uORF1-spe1-F	AGCTCGGATCCACTAGGGACAAAGTCCATCCAACCCAAAC
Dr.kcnj13-uORF1-ecor1-R1	GATCTGTTAACGAATTGGTGATTCCTCAGTGTTCTCAAATGA
Dr.kcnj13-178F-afl2	CGACGGCCAGTCTTAAGTGTTCTCCTCCTCTCTCAAGCT
Dr.kcnj13-142R-ecor1	GATCTGTTAACGAATTACCGAATAATCTTGCTAACGGACC
Pax3a-hind3-F2	CGACGGTATCGATAAGCTGTGCGTGGATTGGGAAGTTCTTGGGA
Pax3a-bamh1-R1	TCTAGAACTAGTGGATCATCTCCTCTGCACGAAAAAAGGATGCA
Dr.kcnj13-CR113	AGTGCTCTGCGGGACTTGTG
Dr.kcnj13-CR142	GCTGGCGCTACGGTGGCGGT
kcnj13-cr113-DF2	AGATACCATCCACATGCCTACCAC
kcnj13-cr113-DR2	GACCGGGAGGAGGAGAATCATG
