# Supplementary material
Source: publisher figshare collection journal article supplement (https://gsajournals.figshare.com/articles/dataset/_/12445469)
Supplement: Supplementary file 3 [file 1]

| WT                                                                                           | kcnj13 <sup>Dhi2059/+</sup>                                                                    |            |
|----------------------------------------------------------------------------------------------|------------------------------------------------------------------------------------------------|------------|
| 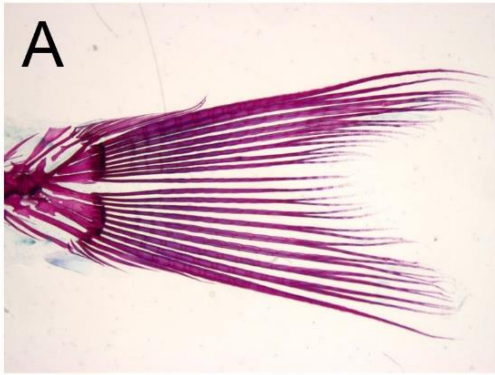 <p>A</p>   |  <p>A'</p>   | Caudal Fin |
|  <p>B</p>  |  <p>B'</p>  | Anal Fin   |
|  <p>C</p> |  <p>C'</p> | Pelvic Fin |
|  <p>D</p> |  <p>D'</p> | Dorsal Fin |

**Figure S1. Skeletal staining of adult zebrafish fins.** (A-D) Wildtype fish. (A'-D') Dhi2059 heterozygotes. No overt differences were noticed between wildtype and Dhi2059 mutant.
