# Supplementary material
Source: publisher figshare collection journal article supplement (https://gsajournals.figshare.com/articles/dataset/_/12445469)
Supplement: Supplementary file 5 [file 1]

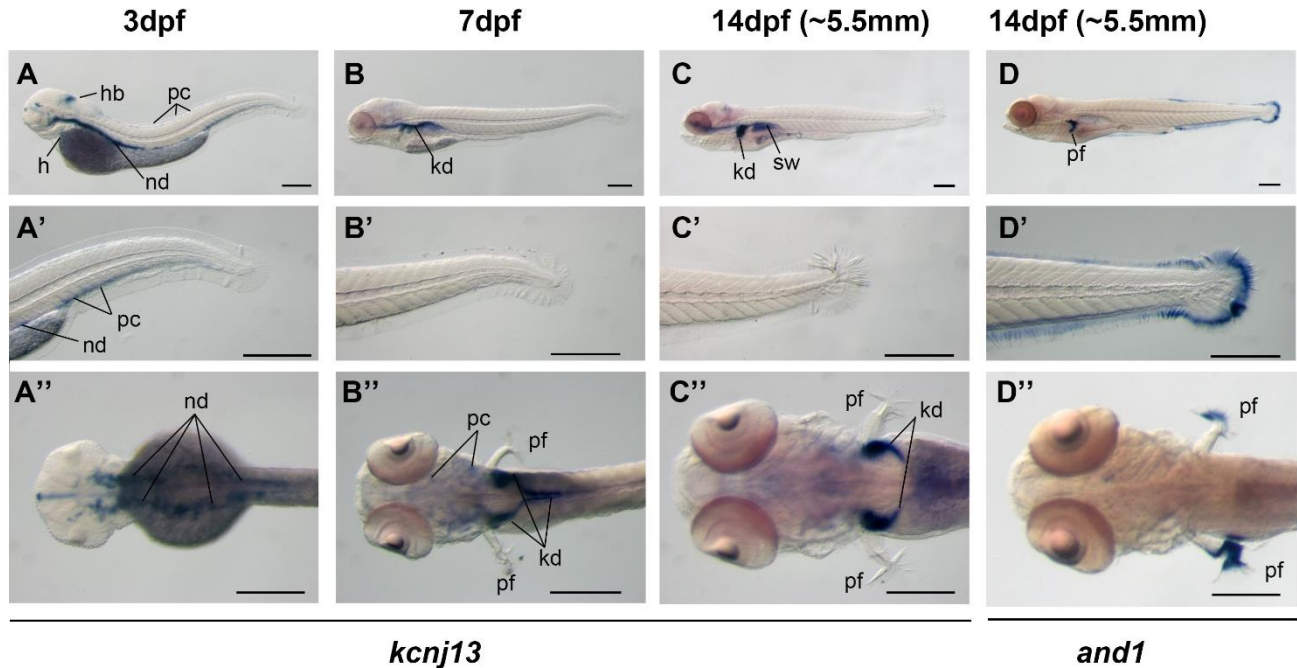

**Figure S4. The *kcnj13* gene is not detectable by *in situ* hybridization during late embryogenesis and larval stages.** (A) At 3dpf stage, the *kcnj13* gene is expressed in the head region, kidney and pigment cells. (A') Magnified view of the caudal fin. No *kcnj13* is expressed. (A'') Dorsal view of the head region of A. (B) At 7dpf stage, the kidney expression remains, while the pigment cell expression dissipates. (B') Magnified view of the caudal fin. No *kcnj13* is expressed. (B'') Dorsal view of the head region of B. (C) At 14dpf (~5.5mm) stage, the *kcnj13* gene expression is similar to 7dpf stage. (C') Magnified view of the caudal fin. No *kcnj13* is expressed. (C'') Dorsal view of the head region of C. (D) The *and1* gene is expressed in the fin fold and developing fin rays. (D') Magnified view of the caudal fin. (D'') Dorsal view of the head region of D. This gene serves as a positive control of *in situ* hybridization for larva zebrafish fin staining. This indicates that lack of *kcnj13* expression is unlikely caused by probe penetration issues in larval fish. *h*, head. *hb*, hind brain. *kd*, kidney. *nd*, nephric duct. *pc*, pigment cell. *pf*, pectoral fin. *sw*, swim bladder. Scale bar: 250µm.
