# Supplementary material
Source: publisher figshare collection journal article supplement (https://gsajournals.figshare.com/articles/dataset/_/12445469)
Supplement: Supplementary file 6 [file 1]

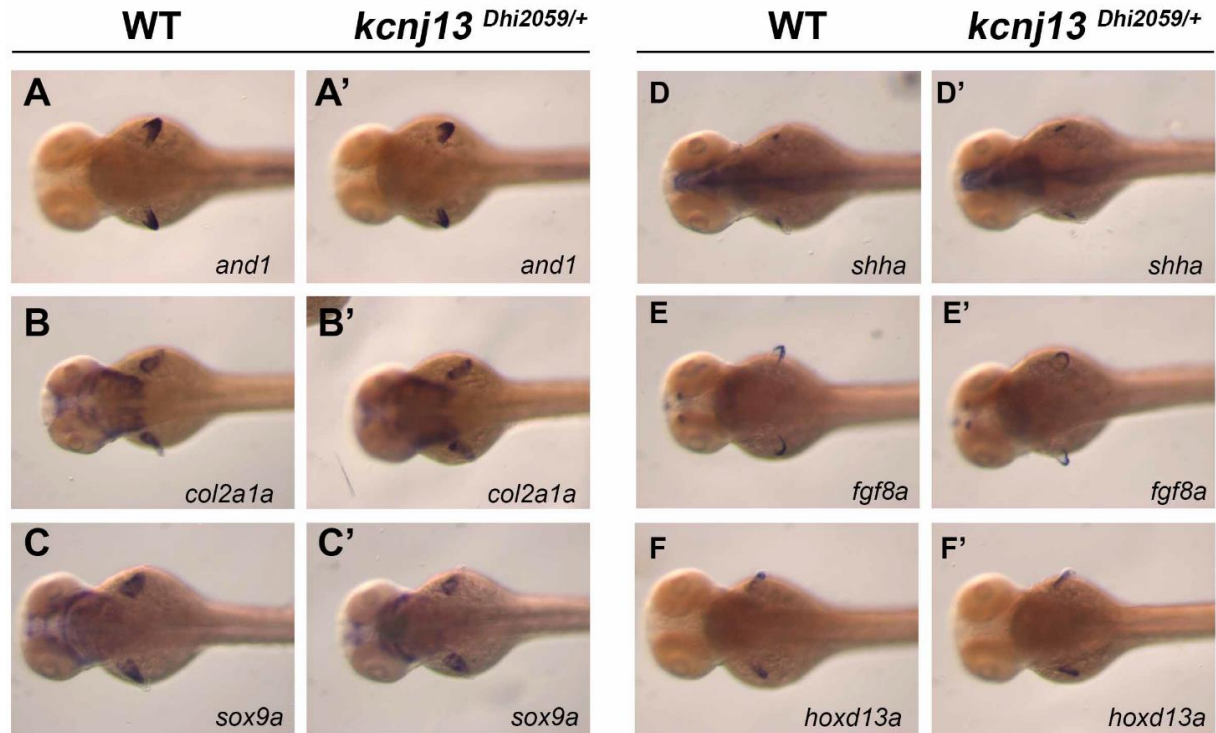

**Figure S5. Molecular markers of zebrafish fin buds by *in situ* hybridization at 72hpf.** (A-F) Wildtype zebrafish embryos. (A'-F') Dhi2059 heterozygotes. (A, A') *and1*. (B, B') *col2a1a*. (C, C') *sox9a*. (D, D') *shha*. (E, E') *fgf8a*. (F, F') *hoxd13a*. Gene expression patterns of these marker genes were similar in both wildtype and Dhi2059 mutants. Embryos were imaged from the front dorsal side.
