# Supplementary material
Source: publisher figshare collection journal article supplement (https://gsajournals.figshare.com/articles/dataset/_/12445469)
Supplement: Supplementary file 7 [file 1]

|      |                                              |                                                                |                            |
|------|----------------------------------------------|----------------------------------------------------------------|----------------------------|
| WT   | AGGAGGCTCCAGAGAGACGTGTTTCAGTGCTCTGCGGGAC-TTG | GGGGCACATGGCTGGCGCTA                                           | -----CGGTGGCGGTGGGTGGTTTGG |
| Mut1 | AGGAGGCTCCAGAGAGACGTGTTTCAGTGCTCT            | -----GTGGGGCACATGGCTGGCGCTA                                    | -----CGGTGGCGGTGGGTGGTTTGG |
| Mut1 | AGGAGGCTCCAGAGAGACGTGTTTCAGTGCTCT            | -----GTGGGGCACATGGCTGGCGCTA                                    | -----CGGTGGCGGTGGGTGGTTTGG |
| Mut1 | AGGAGGCTCCAGAGAGACGTGTTTCAGTGCTCT            | -----GTGGGGCACATGGCTGGCGCTA                                    | -----CGGTGGCGGTGGGTGGTTTGG |
| Mut2 | AGGAGGCTCCAGAGAGACGTGTTTCAGTGCTC             | -----TGGGGCACATG                                               | -----GGTGGGTGGTTTGG        |
| Mut2 | AGGAGGCTCCAGAGAGACGTGTTTCATTGCTC             | -----TGGGGCACATG                                               | -----GGTGGGTGGTTTGG        |
| Mut2 | AGGAGGCTCCAGAGAGACGTGTTTCAGTGCTC             | -----TGGGGCACATG                                               | -----GGTGGGTGGTTTGG        |
| Mut3 | AGGAGGCTCCAGAGAGACGTGTTTCAGTGCTCTGCGGGAC     | TTTGTGGGGCACATGGCTGGCGCTAGCACATGGCTGGCGCACATGGCTGGTGGGTGGTTTGG |                            |
| Mut3 | AGGAGGCTCCAGAGAGACGTGTTTCAGTGCTCTGCGGGAC     | TTTGTGGGGCACATGGCTGGCGCTAGCACATGGCTGGCGCACATGGCTGGTGGGTGGTTTGG |                            |
| Mut3 | AGGAGGCTCCAGAGAGACGTGTTTCAGTGCTCTGCGGGAC     | TTTGTGGGGCACATGGCTGGCGCTAGCACATGGCTGGCGCACATGGCTGGTGGGTGGTTTGG |                            |

**Figure S6. The CRISPR-induced indel mutations in the 6<sup>th</sup> exon of *kcnj13* were validated by Sanger Sequencing.** Genomic DNA were extracted from the caudal fins of F<sub>1</sub> generation fish that were genotyped for Dhi2059. PCRs were performed using primers that flank the target region, then cloned into pJET1.2 vector for single-molecule sequencing. The PAM sequences of CR113 and CR134 are highlighted in yellow and cyan, respectively.
