# Supplementary material
Source: publisher figshare collection journal article supplement (https://gsajournals.figshare.com/articles/dataset/_/12445469)
Supplement: Supplementary file 8 [file 1]

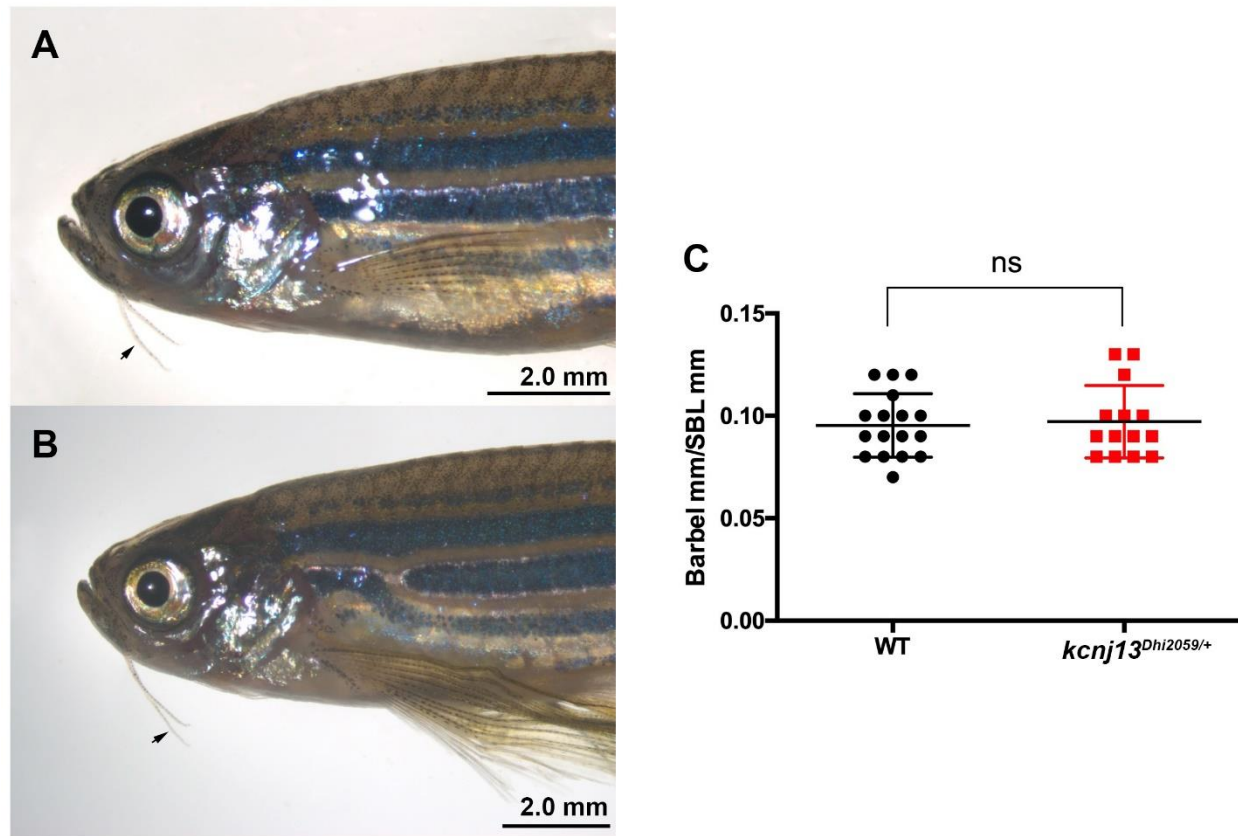

**Figure S2. Barbels are not elongated in Dhi2059.** (A) Wildtype zebrafish. (B) Dhi2059 mutant, *kcnj13*<sup>Dhi2059/+</sup>. (C) Dhi2059 has a similar ratio of barbell length to standard body length. Arrows indicate the barbels. *ns*, statistical non-significance. SBL, standard body length.
